# Supplementary material
Source: PubMed Central journal article supplement (PMC3861735)
Supplement: supp_M113.029066_mcp.M113.029066-1.pdf [file supp_M113.029066_mcp.M113.029066-1.pdf]

**TABLE S1** : Oligonucleotides used for RT-PCR experiments.

---

| <b>Primer name</b> | <b>Sequence 5'-3'</b>       |
|--------------------|-----------------------------|
| <b>F1</b>          | CAATAATGACGTCTTGTTGGAAGTG   |
| <b>R1</b>          | TTTCACGAACCGAGCTAGTATCAGG   |
| <b>F2</b>          | GTTTGATTATCATTGCTGGAGTTGC   |
| <b>R2</b>          | TAAGCGTTCGCTTCTTTAAGTTGAGC  |
| <b>F3</b>          | ACAGCCATCGTTTATTAGTTACTGG   |
| <b>R3</b>          | ACTAAATCTTGCGTATGCGTTGATCC  |
| <b>F4</b>          | GGATACGGTTTACATTTATCCAAAGTC |
| <b>R4</b>          | GGTAGTAATTGTCCCGTTGTTATTGC  |
| <b>F5</b>          | GATTGTAGCATTGCTTATCTCAGTCG  |
| <b>R5</b>          | GAACCCATCGATAAATCGTAGTATGG  |
| <b>TUF-F</b>       | CTTTGCTCAATACGTAAACTTCACC   |
| <b>TUF-R</b>       | CTAAAGTTGAAGAATTGATGGACATCG |

---
