# Supplementary material
Source: PubMed Central journal article supplement (PMC3861735)
Supplement: supp_M113.029066_mcp.M113.029066-2.pdf [file supp_M113.029066_mcp.M113.029066-2.pdf]

**TABLE S2: Surface proteins identified after *de novo* analysis of MS-MS data in adhesive *L. lactis* TIL448 and non-adhesive TIL1230 harvested in exponential phase or stationary phase.**

Surface-exposed proteins were shaved from whole bacteria with trypsin. The unmatched spectra after mass-matching analysis were translated into amino-acid sequences by PeptNovo software and the sequences were searched for homology with FASTS36 software against a Lactobacillales Uniref 90 database using the *de novo* pipeline developed on the PAPPSO platform (<http://pappso.inra.fr/bioinfo/denovopipeline/>).

| Experiment                 | Protein description                                            | Gene name | E-value  | Peptides |
|----------------------------|----------------------------------------------------------------|-----------|----------|----------|
| <b>TIL448_Exponential</b>  |                                                                |           |          |          |
| FASTS                      |                                                                |           |          |          |
| Pass Number                |                                                                |           |          |          |
| 1                          | UniRef90_H5T1K0 Uncharacterized protein                        | yufC      | 3.40E-26 | 14       |
| 2                          | UniRef90_A9QSD0 Peptidoglycan hydrolase with CHAP domain       | usp45     | 5.80E-21 | 16       |
| <b>TIL448_Exponential</b>  |                                                                |           |          |          |
| FASTS                      |                                                                |           |          |          |
| Pass Number                |                                                                |           |          |          |
| 1                          | UniRef90_A9QSD0 Peptidoglycan hydrolase with CHAP domain       | usp45     | 1.40E-18 | 17       |
| 2                          | UniRef90_F2HQ12 Oligopeptide ABC transporter substrate-binding | optA      | 2.60E-06 | 11       |
| <b>TIL1230_Exponential</b> |                                                                |           |          |          |
| FASTS                      |                                                                |           |          |          |
| Pass Number                |                                                                |           |          |          |
| 1                          | UniRef90_A9QSD0 Peptidoglycan hydrolase with CHAP domain       | usp45     | 0        | 19       |
| 2                          | UniRef90_H5T1K0 Uncharacterized protein                        | yufC      | 8.80E-22 | 12       |
| 3                          | UniRef90_G6FA33 Serine-type D-Ala-D-Ala carboxypeptidase       | dacA      | 4.10E-11 | 9        |
| 4                          | UniRef90_F2HQ12 Oligopeptide ABC transporter substrate-binding | optA      | 2.50E-07 | 4        |
| 5                          | UniRef90_F9VBD1 Putative uncharacterized protein               | usp45     | 6.10E-08 | 16       |
| 6                          | UniRef90_D2BN93 Ferrichrome ABC transporter, substrate-binding | fhuD      | 2.30E-07 | 14       |
| <b>TIL1230_Exponential</b> |                                                                |           |          |          |
| FASTS                      |                                                                |           |          |          |
| Pass Number                |                                                                |           |          |          |
| 1                          | UniRef90_A9QSD0 Peptidoglycan hydrolase with CHAP domain       | usp45     | 0        | 22       |
| 2                          | UniRef90_F2HQ12 Oligopeptide ABC transporter substrate-binding | optA      | 7.70E-25 | 10       |
| 3                          | UniRef90_Q9ZB16 Putative uncharacterized protein               | yufC      | 1.40E-17 | 11       |
| 4                          | UniRef90_G6FA33 Serine-type D-Ala-D-Ala carboxypeptidase       | dacA      | 6.30E-14 | 13       |
| 5                          | UniRef90_A9QSD0 Peptidoglycan hydrolase with CHAP domain       | usp45     | 7.60E-09 | 15       |
| 6                          | UniRef90_D2BN93 Ferrichrome ABC transporter, substrate-binding | fhuD      | 4.80E-05 | 11       |
| 7                          | UniRef90_H5T166 Uncharacterized protein                        | ysjH      | 1.40E-11 | 3        |

---

**TIL448\_Stationary**

FASTS

Pass Number

|   |                                                                |          |          |    |
|---|----------------------------------------------------------------|----------|----------|----|
| 1 | UniRef90_A9QSD0 Peptidoglycan hydrolase with CHAP domain       | usp45    | 0        | 15 |
| 2 | UniRef90_F2HQ10 Oligopeptide ABC transporter substrate-binding | optS     | 3.90E-21 | 12 |
| 3 | UniRef90_A9QSD0 Peptidoglycan hydrolase with CHAP domain       | usp45    | 3.10E-19 | 7  |
| 4 | UniRef90_Q8RLX7 Collagen-like protein 2                        | scl2     | 4.30E-08 | 8  |
| 5 | UniRef90_G5JXL6 CHAP domain protein                            | usp45    | 2.90E-07 | 17 |
| 6 | UniRef90_G6FDX2 Aminoacyltransferase                           | pbp2B    | 3.20E-12 | 5  |
| 7 | UniRef90_C7XVU6 N-acetylmuramidase                             | acm-like | 0.00031  | 3  |
| 8 | UniRef90_H5SX69 Penicillin-binding protein 1A                  | ponA     | 0.00049  | 5  |

---

**TIL448\_Stationary**

FASTS

Pass Number

|   |                                                                |       |          |    |
|---|----------------------------------------------------------------|-------|----------|----|
| 1 | UniRef90_A9QSD0 Peptidoglycan hydrolase with CHAP domain       | usp45 | 0        | 15 |
| 2 | UniRef90_P22865 Secreted 45 kDa protein                        | usp45 | 2.40E-17 | 14 |
| 3 | UniRef90_F2HQ12 Oligopeptide ABC transporter substrate-binding | optA  | 4.30E-16 | 17 |
| 4 | UniRef90_G6FDX2 Aminoacyltransferase                           | pbp2B | 1.50E-14 | 3  |
| 5 | UniRef90_G6FEX2 Hydrolase acting on carbon-nitrogen bonds      | xynD  | 4.50E-11 | 5  |
| 6 | UniRef90_F2HQ10 Oligopeptide ABC transporter substrate-binding | optS  | 4.20E-05 | 5  |
| 7 | UniRef90_H5T202 Uncharacterized protein                        | ywal  | 0.00057  | 12 |

---

**TIL1230\_Stationary**

FASTS

Pass Number

|   |                                                                |       |          |    |
|---|----------------------------------------------------------------|-------|----------|----|
| 1 | UniRef90_A9QSD0 Peptidoglycan hydrolase with CHAP domain       | usp45 | 0        | 14 |
| 2 | UniRef90_G6FEQ8 Succinate dehydrogenase                        | frdC  | 9.70E-18 | 4  |
| 3 | UniRef90_F2HJH0 Thiamine biosynthesis lipoprotein              | apbE2 | 1.10E-14 | 12 |
| 4 | UniRef90_D9N521 Glucan-binding protein B                       | gbpB  | 4.50E-10 | 8  |
| 5 | UniRef90_D2BN93 Ferrichrome ABC transporter, substrate-binding | fhuD  | 6.60E-08 | 8  |
| 6 | UniRef90_Q9F684 Collagen-like surface protein (Fragment)       | sclA  | 3.80E-05 | 6  |

---

**TIL1230\_Stationary**

FASTS

Pass Number

|   |                                                             |       |          |    |
|---|-------------------------------------------------------------|-------|----------|----|
| 1 | UniRef90_A9QSD0 Peptidoglycan hydrolase with CHAP domain    | usp45 | 0        | 14 |
| 2 | UniRef90_G6FEQ8 Succinate dehydrogenase                     | frdC  | 8.10E-29 | 12 |
| 3 | UniRef90_F2HJH0 Thiamine biosynthesis lipoprotein           | apbE2 | 1.70E-18 | 7  |
| 4 | UniRef90_A9QSD0 Peptidoglycan hydrolase with CHAP domain    | usp45 | 3.20E-13 | 11 |
| 5 | UniRef90_G6FEQ8 Succinate dehydrogenase                     | frdC  | 6.80E-10 | 6  |
| 6 | UniRef90_C2LQ29 LPXTG-motif cell wall anchor domain protein |       | 2.30E-05 | 15 |

---
