# Supplementary material
Source: PubMed Central journal article supplement (PMC3861735)
Supplement: supp_M113.029066_mcp.M113.029066-3.pdf [file supp_M113.029066_mcp.M113.029066-3.pdf]

**TABLE S3:** Protein sequence % coverage of the ORFs deduced from the nucleotide sequence of the contigs obtained by *L. lactis* TIL448 plasmid sequencing and which were identified by LC-MS-MS after the shaving experiments (listed in Table II). Matched peptides are shown in yellow.

| Contig                                                                                                                                                                                                                                                                                                                                                                                                                                                                                                                                                                                                                                                                                                                                                                                                                                                                                                                                                                                                                                                                                                                                                                                                                                                                                                                                                                                                                                                                                                                                                                                                                                                              | Number of amino acid residues | % coverage |
|---------------------------------------------------------------------------------------------------------------------------------------------------------------------------------------------------------------------------------------------------------------------------------------------------------------------------------------------------------------------------------------------------------------------------------------------------------------------------------------------------------------------------------------------------------------------------------------------------------------------------------------------------------------------------------------------------------------------------------------------------------------------------------------------------------------------------------------------------------------------------------------------------------------------------------------------------------------------------------------------------------------------------------------------------------------------------------------------------------------------------------------------------------------------------------------------------------------------------------------------------------------------------------------------------------------------------------------------------------------------------------------------------------------------------------------------------------------------------------------------------------------------------------------------------------------------------------------------------------------------------------------------------------------------|-------------------------------|------------|
| <p><b>Contig 324 (pilin YhgE2)</b></p> <p>MKLKTCCKSFNQKVTIATVSLTLLATVGGNSNSVFA<b>DSTNTPDTSSVR</b><br/> <b>EITVHAYNGTKNNANTLGNNDGSPLTGIIKAQSLSNVGFSAVK</b>IEPA<br/>           SGYTVTTMDPSNSSTYNLVGSPVIGTTGADGTATLNIGTGSANDGY<br/>           YLVTQTTSSDGI TAAAPFIVQVPLNYTR<b>TSPDGSWTYDVN</b>VYPK<b>LD</b><br/> <b>ASQYTNPKDTIGLNDGTNTDK</b>QSSI FVGQNV TWNLATNFPTSMR<b>IK</b><br/> <b>NSNGSF</b>TYGKA<b>E</b>FKD<b>Q</b>LD<b>S</b>N<b>L</b>TY<b>K</b>SITFSTALQNTSTNSFSQITPL<br/>           TLIADNDYTLTTTNGMVDI ILLTNTGIDKVLAAALPAATPGNTSMFI P<br/>           NITTMVSANYTFGQIGNSFIPNLTNAYGVNLNPNNSNPATPTTP<br/>           GGQTPDLYLGALS<b>LKQVDSVSGTVLQGA</b>VFGIAT<b>SAEKASAGDFVQ</b><br/> <b>KGSDGTL</b>YAD<b>KESV</b>PN<b>GV</b>KTAD<b>YTQ</b>TTD<b>ANGQATFVGLQLQDNTDV</b><br/> <b>TNVS</b>RANTTYI<b>ISE</b>LAPAGYNI<b>P</b>NGPFQVTAGITNPLNNL<b>KNNLN</b><br/>           GGNIKLPFTGGQGI IGLII IAGVAAGGSII IRRRKTIDEG</p>                                                                                                                                                                                                                                                                                                                                                                                                                                                                                                                                                                                                                                                                                                                                           | 546                           | 35 %       |
| <p><b>Contig 608 (mucus-binding protein muc)</b></p> <p>MRKIIGKKNKVHYVEETTRFQMVKSHKGWLVIGASMFALGLGVQVT<br/>           SRPVSADVATSTSSSAVNAETTSASSSSAVNADSTSANKSSAVNA<br/>           ETTGASSSSAVNADSTSANNSSAVNAETTSASSSSATNADSTSASS<br/>           SSAVNADSTSANNSSAVNAETTSASSSSATNAETTSASSSSAVNAD<br/>           STSASSSSAVNADSTSANNSSAVNAETTSASSSSATNAETTSASSSS<br/>           SAVNADSTSASISAM<b>KADVTSAGSVTNT</b>GFVSDPDYPSGMWIDPD<br/>           NSHYSYEWLQANQGGNQIVFSTNRTGDGIVYVTELSALNKVLKQYT<br/>           LNQNTQVTSAVFASTIYYNDVYFEMVRSSNSFVIKYTASKFDNIS<br/>           YNTLSYFVPKLITQTTYVVDKDGKQIIDSNGNPVAAAYTQKGLVGQN<br/>           YTTGDVNVNGYYAIA<b>PANSNGVMS</b>PY<b>GK</b>IGASYVKNFHDGVVITY<br/>           TQTGSDGMSASIAQNGTVLQWTWTSIKPSDPTITYQLGYAKYGIKN<br/>           PYIPQTSDIKYVYNKLGWIVYNPDGSTTSRIYPNDPSNPTKIADS<br/>           SVPDYPVIAFIPGYIPEDHMGTPLPVDPDDRTKGYIPPTPSDNGT<br/>           DTTITYTADTQ<b>KGSVSYVDDTTGK</b>TLKTDSISGTTGSK<b>STYSTSGN</b><br/> <b>IADYKK</b>QGYALVTDGYPAALTFDNDDDTTDQNFVHLKHQLTPVNP<br/>           EPQTPGAPINPDEPDGPKWPTSTYYDKTVNETVSYVDQNGHVVAQ<br/>           HTDSVNFTRTVVVDNVTGEVITSGAGTTAWTATNGD'TFDVAVSPV<br/>           VPGSVADKAQTAAVTDLTADSSDVNETVYTKVGLVPSSSDGNFP<br/>           GAPTVGYPNDPDATKVTTPAGVPTVPGYTAHDPEGHVLTGSSYQP<br/>           SDPTKDTTITYTADTQKGSVSYVDDTTGKTLKTDSISGTTGSKSSY<br/>           STSGNIADYKKQGYALVTDGYPAALTFDNDDDTTDQNFVHLKHQNI<br/>           QSTEAKTVTETIHYQGAGNQTPADNTAQVTFTRQVSTDTVTGEKTY<br/>           GSWADQSFAAVTSPVIKGYTPDQAEIGAKTVSGDASDLDFTVIYT<br/>           KDAPTKPVKPSQPTT<b>PAKPVQAGQAAATNFVDQRLPQTGETDQQHM</b><br/>           TLSGLLLLAMSTVLGLFGMTKRQRKE</p> | 1130                          | 4.4%       |
| <p><b>Contig 352 (OppA-like, peptide transport system)</b></p> <p>PKLKYKYKKL<b>KAGNFDVAYQNPDKAIKGGNLKVAYQSDSPIKAEWL</b></p>                                                                                                                                                                                                                                                                                                                                                                                                                                                                                                                                                                                                                                                                                                                                                                                                                                                                                                                                                                                                                                                                                                                                                                                                                                                                                                                                                                                                                                                                                                                                         | 366 (partial)                 | 27.6 %     |

|                                                                                                                                                                                                                                                                                                                                                                                                                                                                                                                                                                                                                                                                                                                                                                                                                                                                                                                                                                                                                           |               |       |
|---------------------------------------------------------------------------------------------------------------------------------------------------------------------------------------------------------------------------------------------------------------------------------------------------------------------------------------------------------------------------------------------------------------------------------------------------------------------------------------------------------------------------------------------------------------------------------------------------------------------------------------------------------------------------------------------------------------------------------------------------------------------------------------------------------------------------------------------------------------------------------------------------------------------------------------------------------------------------------------------------------------------------|---------------|-------|
| <p>AGLSDDATFSTMSSPGGGQDALFFTNSSFK<b>FIDGGPANVSLDQKAK</b><br/> TATITLRKDLKWSGDGSEVTAKDYEFTYETIANPAYGSDRWTDSLAN<br/> IVGLSDYHAGKAKTISGITFPDGENGKVIKVQFKEMKPGMTQSGNG<br/> YFLESVAPYQYLKDVAPKDLASSPKTTTKPLVTGPFKENVVAGES<br/> IKYVPNPYYWGKKPKLNSITYEIVSTAKSVAALSSGKYDFINGMAN<br/> SQYKQVKNLKGKYLGLGQALYISLMYYNLGHYDAKNSINVQDR<b>KTP</b><br/> <b>LQDQNV</b>QAIGYARNVAEVDNKFSNGLSTPANSIPIPKQFTSPS<br/> VK<b>GYEKQDLDKANKLLDE</b>DGWKLNK<b>STG</b></p>                                                                                                                                                                                                                                                                                                                                                                                                                                                                                                                                                                           |               |       |
| <p><b>Contig 347 (glucan sucrose)</b></p> <p>CLSQLNKVNNNATPQADNAAANDYNHSDNGNYGYIDSATINNNQLH<br/> VV<b>GWSATNQAVNKDTSRYVIAYDNTTNS</b>ELGRVQVTNPVARPDVKK<br/> AHNVYDAQNSGFVNVSLNFDKMNSYCDAIRIISRYSGVDPGNSDY<br/> VDYVSPVVLDKNDYAYLDNFVNVNGILHVSQWGNATNKAIKRPNH<br/> VILYDRTTNREVARQR<b>VITGIERPDVER</b>AYPQVNVANI SGFAADFG<br/> VTNLNPNDEYQILSR<b>YSNRDNGEGSYVTHGFNPQR</b>LAPTTFQNRGY<br/> LDNFNISKAGQFAVRGWQATNLSNIQSNRFVILFDNTAKRQVASVK<br/> <b>ISGTRDPDVEKAYSQVLNAAK</b>SGYNVTFDLNQSQIAQLLPNHSYSI<br/> VSRYSADANGNGNKKQHTDIWSAPIVLDK<b>TASHIDGISLNSN</b>LN<br/> KGWMSADASATQTNPYVIVLNNNGKEVARQ<b>KLTLTARPDVAR</b>VYPDI<br/> YNSSISGFNTTINLTVPKLNQLTGNMQILL<b>RYSAASDGNP</b>TRNGGT<br/> TNQYSK<b>NYATNGGNFDFVK</b>VDDNNQVEFSGWHVSDQATDKPYQWII<br/> LANGKEVGRQLISSTTDGLVSYNRPDVYVNPAPISDSSTSGFQGI<br/> TLNSSIKNVRVQLVHRFSDDGQKGEANRVDFWSK<b>VMPVASTFQKGS</b><br/> <b>DPVMK</b>NLVAKPQGNQLNIYNGNTNGNTVLKTLGPGTWENMAFAQDS<br/> SAIN</p>                                                                                      | 694 (partial) | 29.7% |
| <p><b>Contig 351 (glucan sucrose)</b></p> <p>AQFIKYFVNNGYENANYRLTKVSVANLNK<b>DTDATVNLNTAAQNLR</b>YV<br/> <b>IEQSIATNK</b>GTGKLANDINGFAATVPELSASSELSLQSMKNYKDE<br/> SGTVDSQVIFVNSADSKYRSMNRTINNQTGNDNSDNPPELLVGN<br/> IDNSNPVQAENLNWEYFLLNYGKLMGYNQDGNFDGFRIDAADNID<br/> ADVLDQMGQLMNDMYHMKGNPQNANNHLSYNEGYHSGAAQMLNKK<b>G</b><br/> <b>NPQLYMDSR</b>EFTYLENILGRANNRDTISNLVTNSIVNRQNDVTENE<br/> ATPNWSFVTNHDQRKNLINRLI IKDHPGIAYIMGSAYKAEYADQAW<br/> QEFYADQKTKDQYAYNVPAQYAILLSNKDTPQIYYGDLYNETA<br/> QYMQEKSIIYDAITTLMKAR<b>KQFVSGGQTMTK</b>LSDNLIASVR<b>YGKG</b><br/> <b>VANANSEGTDSL</b>SR<b>T</b>SGMAVIVGNPQMAEQTISINMGRAHANEQY<br/> RNLLDTTDNGLYNADGAENPETLTDDNGILKVTVKGYSNPYVSG<br/> YLVVWVPPVSGNQDVTTNAATVSADSNKIFESNAALDSHMIYEDFS<br/> LYQPEPTSTENHAYNIIAQNAELFNNLGITDFWMAPAYTSSDMSRY<br/> NEGYSVTDRYNLGTNANLTKYGSGEELANAIAALHSAGLKVQEDIV<br/> MNQMI<b>GFPGQEAVTVTR</b>TDNRGKQIYVNGKTYANQIYFAYTTGGGN<br/> GQETYGGKYLSELQSKYPDLFTTR<b>AISTDVAPDPTTHITK</b>WSAKYE<br/> NGTSLQNIIGLAVKLPNGEYAYLRSSDNKSFNTLLPSEIGRL</p> | 779 (partial) | 12 %  |
| <p><b>Contig 597 (nisin resistance protein)</b></p> <p>WRIFNMKIGKRILLGLVAVCALFLGIIYFWGYKFNIYLVPPSPQKY<br/> VRVALKNMDELGLFTDSKEWVETKKKTI EETSNAKNYAETIPFLQK<br/> AIKVAGGKHSFIEHEEDISKRSITKYIKPKAEIEGNTLILTIPEFT<br/> GNDSQASDYANFLESSLHKNNYNGVIVDLRGNRGGDLSPMVLGLSP<br/> LLPDGTLFTYVDKSSHSKPVELQNGEINSGGSSTKVS DNKKIKKAP<br/> IAVLIDNNTGSSGELTALCFKGI PNVKFLGSDSAGYTSANQTVYLY<br/> DGSTLQITSAFVKDRTNNIYK<b>NFPI</b>SPDIQTNNAKSSAIEWIK<b>SQI</b><br/> K</p>                                                                                                                                                                                                                                                                                                                                                                                                                                                                                                                                                                 | 323 (partial) | 6.8%  |
