# Supplementary material
Source: PubMed Central journal article supplement (PMC3861735)
Supplement: supp_M113.029066_mcp.M113.029066-5.pdf [file supp_M113.029066_mcp.M113.029066-5.pdf]

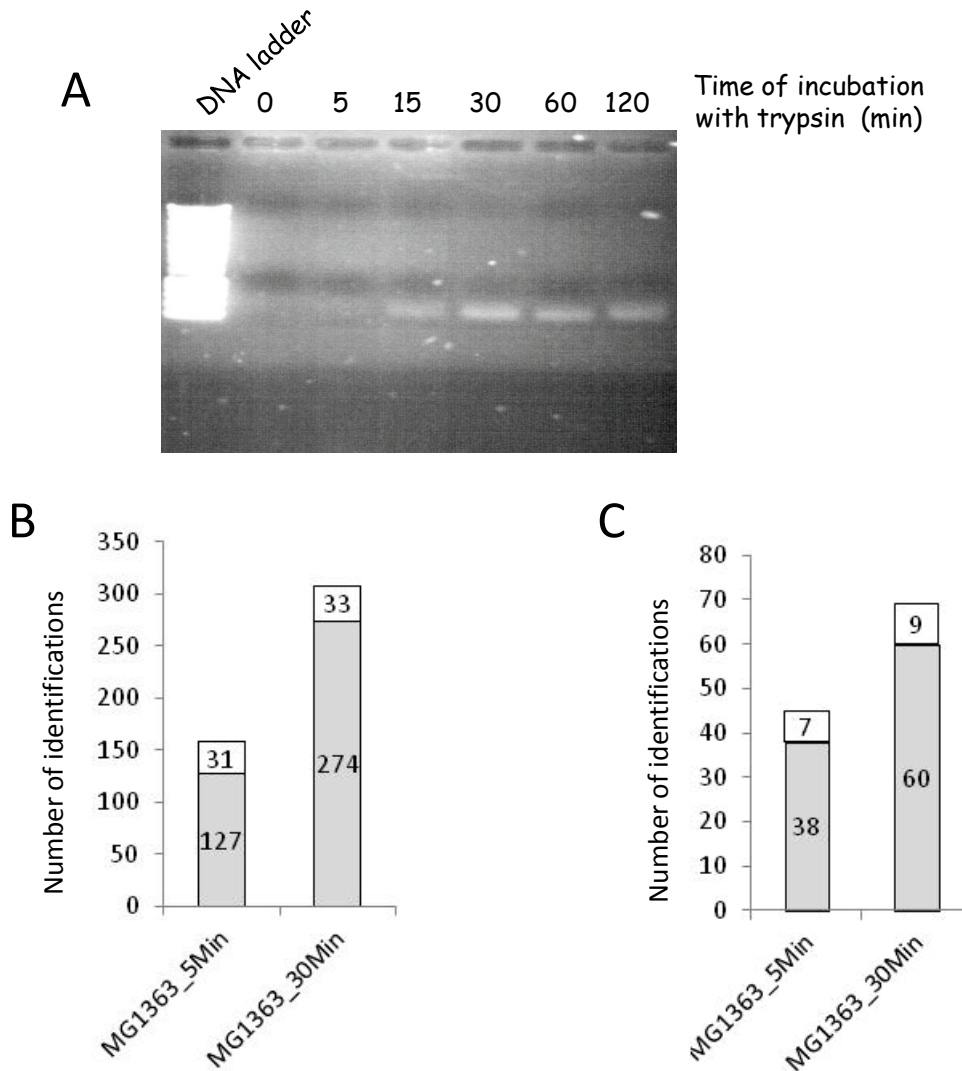

**Figure S1: Optimisation of shaving conditions on *L. lactis* MG1363 cells.**

*A*, detection in agarose gel after ethidium bromide staining of nucleic acids released from MG1363 cells in shaving supernatants after different incubation times with trypsin (between 0 and 120 min).

*B*, numbers of peptides attributed to proteins predicted with a cytoplasmic location (grey bars) or extracellular location (white bars) detected by LC-MS-MS after 5 and 30 min incubation of MG1363 cells with trypsin.

*C*, numbers of proteins with a predicted cytoplasmic location (grey bars) or extracellular location (white bars) detected after 5 and 30 min incubation of MG1363 cells with trypsin.

Protein location was predicted as cytoplasmic or extracellular with LocateP software. Extracellular proteins include proteins with LPXTG sortase signal, lipoprotein, proteins anchored in the cytoplasmic membrane by an N-anchor and proteins secreted with a cleavable signal sequence.
