# Supplementary material
Source: PubMed Central journal article supplement (PMC3861735)
Supplement: supp_M113.029066_mcp.M113.029066-6.pdf [file supp_M113.029066_mcp.M113.029066-6.pdf]

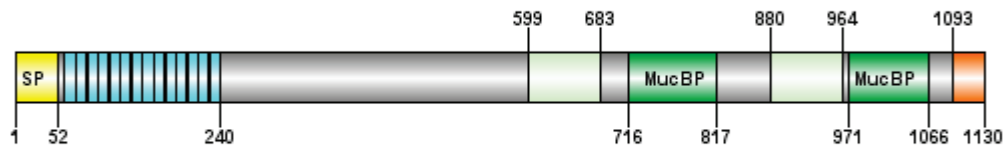

**Figure S2: Schematic representation of the MUB-protein identified in *L. lactis* TIL448.** SP, signal peptide. MucBP, mucus-binding domain (Pfam PF06458). In blue are represented 14 repeated sequences with consensus sequence SSA(V,T)NA(D,E)(S,T)T(S,G)A. In light green, two completely identical sequences. In orange, the C-terminal peptidoglycan-anchoring motif constituted of LPXTG followed by a hydrophobic domain and a positively-charged tail.
