# Supplementary material
Source: PubMed Central journal article supplement (PMC3861735)
Supplement: supp_M113.029066_mcp.M113.029066-7.pdf [file supp_M113.029066_mcp.M113.029066-7.pdf]

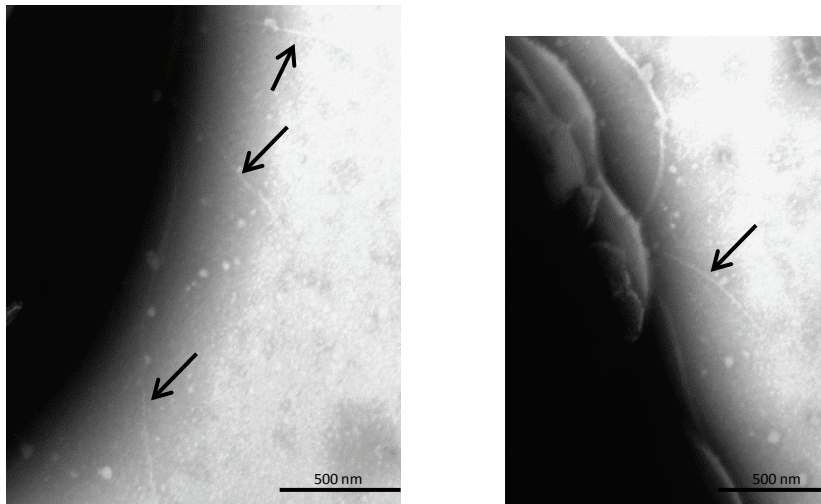

**Figure S3: Electron micrographs of *L. lactis* complemented TIL1289 mutant after negative staining.**

TIL1289 *yhgE2*-negative mutant was complemented by cloning the four genes of the pilin cluster on a multicopy plasmid pJIM2246. Pili are indicated by arrows.
